# Supplementary material for: Detection of Aneuploidy in Cerebrospinal Fluid from Patients with Breast Cancer Can Improve Diagnosis of Leptomeningeal Metastases
Source: Oxford University Press journal article supplement (doi:10.1158/1078-0432.ccr-20-3954), 2021-01-29
Supplement: 10780432ccr203954-sup-253342_2_supp_6854620_qn5d44.xlsx [file 10780432ccr203954-sup-253342_2_supp_6854620_qn5d44.xlsx]

## Sheet: Supplementary Table S1
Supplementary Table S1
A) Cytology positive versus negative							B) mFAST-SeqS positive versus negative
	Cytology positive		Cytology negative					FastSeq ≥5		FastSeq <5
	(n=13)		(n=106)					(n=24)		(n=88)
	N	%	N	%	P-value			N	%	N	%	P-value
Age (median)	56 (42.5-77.0)		54.5 (45.0-63.0)		0.399		Age (median)	57.5 (42.0-64.8)		54.5 (44.3 - 64.5)		0.798
Breast cancer subtype					0.494		Breast cancer subtype					0.864
ER-positive/HER2-negative	10	76.9	58	59.8			ER-positive/HER2-negative	14	58.3	55	62.5
ER-positive/HER2-positive	0	0.00	10	10.3			ER-positive/HER2-positive	2	8.3	8	9.1
Triple negative	2	15.4	10	10.3			Triple negative	4	16.7	9	10.2
ER-negative/HER2-positive	1	7.7	7	7.2			ER-negative/HER2-positive	1	4.2	7	8
Unknown	0	0	12	12.4			Unknown	3	12.5	9	10.2
Clinical signs							Clinical signs
Headache	7	53.8	41	38.7	0.506		Headache	9	37.5	34	38.6	1000
Nausea/vomiting	5	38.5	31	29.2	0.631		Nausea/vomiting	10	41.7	22	25.0	0.230
Mental changes	3	23.1	13	12.3	0.567		Mental changes	3	12.5	12	13.6	1000
Gait difficulties	4	30.8	18	17.0	0.483		Gait difficulties	9	37.5	13	14.7	0.035
Meningeal rigidity	2	15.4	1	0.9	0.015		Meningeal rigidity	2	8.3	1	1.1	0.098
Cranial nerve palsies	5	38.5	22	20.8	0.187		Cranial nerve palsies	10	41.7	15	17.0	0.034
Spinal symptoms	10	76.9	64	60.4	0.107		Spinal symptoms	20	83.3	52	59.1	0.030
Metastatic disease at time of LP							Metastatic disease at time of LP
Yes	13	100.0	66	62.3	0.004		Yes	21	87.5	53	60.2	0.009
Bone	10	76.9	54	50.9	0.232		Bone	17	70.8	43	48.9	0.129
Liver	4	30.8	22	20.8	0.157		Liver	6	25.0	17	19.3	0.331
Lymph node	4	30.8	33	31.1	0.294		Lymph node	13	54.1	18	20.5	0.001
Lung/pleural	2	15.4	22	20.8	1000		Lung/pleural	7	29.1	15	17.0	0.387
(sub)cutaneous	2	15.4	9	8.5	0.419		(sub)cutaneous	3	12.5	9	10.2	0.780
Gastrointestinal	1	7.7	2	1.9	0.374		Gastrointestinal	1	4.2	2	2.3	0.625
Gynaecological	0	0.0	1	0.9	1000		Gynecological	0	0.0	1	1.1	1000
Brain (or status after resection/radiotherapy)	6	46.2	8	7.5	0.001		Kidney	1	4.2	1	1.1	0.625
Kidney/Adrenal	1	7.7	1	0.9	0.374		Brain	6	25	8	9.1	0.074
No	0	0.0	40	37.7			No	3	12.5	35	39.8
CSF Chemistry†							CSF Cytology					<0.001
Leukocytes (x 106/L, normal = 0-4 x 106/L)	2.00 (1.50-16.15)		1.30 (1.00-3.00)		0.044		Positive	10	41.7	3	3.4
Protein (g/L, normal = 0.18-0.58 g/L )	0.48 (0.26-0.79)		0.32 (0.23-0.43)		0.114		Equivocal	1	4.2	1	1.1
Glucose (mmol/L, normal = 2.5-3.7 mmol/L )	3.30 (2.05-3.75)		3.50 (3.30-4.00)		0.050		Negative	13	54.2	84	95.5
Volume for cytology (mL)	5.5 (4.25-7.0)		5.0 (3.0-9.0)		0.639		CSF Chemistry
CSF cfDNA†							Leukocytes (x 106/L, normal = 0-4 x 106/L)	1.7 (1.0-6.5)		2.0 (1.0-3.0)		0.789
cfDNA concentration (ng/mL CSF)	3.92 (2.57-12.51)		5.32 (3.70-10.47)		0.263		Protein (g/L, normal = 0.18-0.58 g/L )	0.46 (0.24-0.63)		0.32 (0.23-0.42)		0.042
							Glucose (mmol/L, normal = 2.5-3.7 mmol/L )	3.5 (3.3-4.3)		3.4 (3.2-3.8)		0.736
							CSF
							cfDNA concentration (ng/mL CSF)	5.5 (3.3-30.5)		5.0 (3.3-8.6)		0.239
† Values are median (Inter quartile range)
Abbreviations: cerebrospinal fluid (CSF); cell-free DNA (cfDNA); estrogen receptor (ER); human epidermal growth factor receptor 2 (HER2); lumbar puncture (LP); magnetic resonance imaging (MRI)

## Sheet: Supplementary Table S2
Supplementary table 2 – Overview of mutation analyses of samples with suffient (median molecular coverage ≥500) coverage
Patient	Cytology result	Final CNS diagnosis	ng for FAST-SeqS	Genome wide z-score	Reads FAST-SeqS	ng for NGS	Median Mol Coverage	Chrom	Gene	Position	Read Cov	Allele Read Cov	Allele Read Freq	Mol Coverage	Allele Mol Cov	Allele Mol Freq (%)	chr1p	chr1q	chr10p	chr10q	chr11p	chr11q	chr12p	chr12q	chr13p	chr13q	chr14p	chr14q	chr15p	chr15q	chr16p	chr16q	chr17p	chr17q	chr18p	chr18q	chr19p	chr19q	chr2p	chr2q	chr20p	chr20q	chr21p	chr21q	chr22p	chr22q	chr3p	chr3q	chr4p
44	Positive	LM at LP	0.9982	28.412	143860	20.93	1766	chr3	PIK3CA	p.E545K	37039	15007	40517	3273	1329	40605	-7.1767	26.6138	1.45035	-3.65075	-2.3787	-11.1868	9.65469	3.45784	NA	8.88523	NA	5.19783	NA	2.67734	1.59894	-3.29658	-3.09105	-1.19978	-1.50234	-2.30563	0.64499	-0.287258	-3.04025	-4.36201	-0.642308	-0.757344	0.0546462	-0.267502	NA	-4.00414	-3.39498	-2.53118	-4.10925
								chr6	ESR1	p.Y537S	26614	8687	32641	3026	983	32485
79 (1st LP)	Negative	LM second LP	1	-0.79066	126353	19.37	3534	-	-	-	-	-	-	-	-	-	0.430628	-0.631879	-0.0643708	-0.503206	1.29469	0.304192	1.06828	0.714162	NA	1.50694	NA	0.861479	NA	-1.0399	0.75541	-0.0490663	0.732379	-0.331257	-0.645386	0.82456	0.479352	0.814932	-1.11067	0.512133	0.7404	0.307691	-0.183671	0.259309	NA	0.335923	0.709143	-0.300014	0.0757914
79 (2nd LP)	Positive	LM at LP	0.979	-0.815503	259019	22.25	4574	chr17	TP53	p.G245V	122742	106	0.086	4547	5	0.110	0.237669	0.0405434	-0.240217	-0.268497	0.981486	-0.470789	0.316449	0.495276	NA	1.09043	NA	0.822148	NA	0.265307	0.0342032	0.194624	0.444366	0.494083	-0.0822631	0.224142	1.13954	0.898427	-0.39698	0.338592	0.892255	0.0691188	-0.390409	0.953158	NA	-0.286414	-0.49289	-0.497952	1.65363
								chr17	TP53	p.P152L	134585	70	0.052	5064	5	0.099
80	Negative	No CNS diagnosis	1	-0.809558	135281	13.13	894	-	-	-	-	-	-	-	-	-	0.366112	-0.448754	-0.18571	-0.0825182	0.839315	-0.048221	0.00240904	0.0231075	NA	0.740238	NA	0.30102	NA	0.373751	-0.897657	-0.0569654	-1.10269	-1.00668	0.076544	-0.505654	1.34728	0.281677	-0.590191	1.07533	0.885753	-0.2357	0.0717839	1.24135	NA	-0.191061	-1.10513	-0.21952	-0.336715
110	Positive	LM at LP	1	12.0728	124309	7.502	813	chr17	TP53	p.R273H	83229	481	0.578	1017	5	0.492	-2.78877	22.0478	-3.01485	-2.99453	0.134025	-1.09133	0.164254	0.748406	NA	-2.58823	NA	1.60806	NA	2.91969	2.82104	-3.14306	-1.38269	-1.48221	-3.16506	-5.2677	-0.349281	0.552434	-0.097145	1.92271	3.43712	2.2937	0.00106736	1.06658	NA	-2.62453	-2.13733	-2.69816	-4.66929
27	Positive	LM and status after resection/RT	1	7.9485	141333	13.91	1912	chr3	PIK3CA	p.E545K	69060	19646	28448	1912	552	28870	-0.29399	13.8062	-0.351368	-5.04839	-0.984458	-1.0595	-0.0656442	-0.927899	NA	-7.08688	NA	-0.738275	NA	0.0570621	2.91484	-2.22478	-0.11328	-0.782475	-2.15301	-4.68489	0.94432	0.813412	-0.702952	-2.13858	1.72368	2.16011	0.152877	-0.188259	NA	-0.789051	3.20856	2.2169	0.866325
								chr3	PIK3CA	p.E726K	94509	25459	26938	2815	777	27602
								chr6	ESR1	p.Y537C	72900	13723	18824	2382	435	18262
14	Positive	LM and status after resection/RT	1.184	2.09809	115054	7.104	706	-	-	-	-	-	-	-	-	-	-0.667974	7.74997	2.48402	-1.76629	-0.0698597	-0.81489	0.740682	1.5424	NA	-0.0592568	NA	1.20841	NA	-0.543785	0.995484	-0.0338168	0.468376	0.710665	2.27715	1.17924	1.92405	2.54562	-0.120246	-1.06465	0.656898	0.408838	-0.0924512	0.705794	NA	0.915569	-0.984921	0.5465	-0.779896
62	Positive	LM and status after resection/RT	1.132	39.255	98894	6.792	681	-	-	-	-	-	-	-	-	-	11.6438	11.6438	11.6438	11.6438	11.6438	11.6438	11.6438	11.6438	11.6438	11.6438	11.6438	11.6438	11.6438	11.6438	11.6438	11.6438	11.6438	11.6438	11.6438	11.6438	11.6438	11.6438	11.6438	11.6438	11.6438	11.6438	11.6438	11.6438	11.6438	11.6438	11.6438	11.6438	11.6438
[truncated: 21 more columns]

## Sheet: Supplementary Table S3
Supplementary table 3 – Patient characteristics of patients with successful mFAST-SeqS result
	N=112
	N	%
Age at LP
Median	55 (45.0-64.8)
Gender
Female	112	100
CSF cytology
Positive	13	13.0
Equivocal	2	2.2
Negative	97	84.8
CSF chemistry
Leukocytes (x 106/L, normal = 0-4 x 106/L)	2.0 (1.0-3.1)
Protein (g/L, normal = 0.18-0.58 g/L )	0.33 (0.23-0.47)
Glucose (mmol/L, normal = 2.5-3.7 mmol/L )	3.5 (3.2-3.8)
MRI brain*	70	62.5
Normal	36	32.1
LM only	1	0.9
Suspicion of LM (leptomeningeal enhancement)	7	6.3
LM and brain metastases	2	1.8
Brain metastases	10	8.9
Dural metastases	5	4.5
Brain metastases and status after RT or resection	2	1.8
Suspicion of brain metastases	1	0.9
Bone metastases	10	8.9
Spine MRI*	61	54.5
Normal	25	22.3
LM and bone metastases	1	0.9
Suspicion of LM (leptomeningeal enhancement or nodules)	5	4.5
Bone metastases	30	26.8
Breast cancer subtype
ER-positive/HER2-negative	69	61.6
ER-positive/HER2-positive	10	8.9
Triple negative	13	11.6
ER-negative/HER2-positive	8	7.1
Unknown	12	10.7
Prior systemic therapy
Yes	97	86.6
Endocrine therapy only	14	12.5
Chemotherapy only	14	12.5
Endocrine and chemotherapy	56	50.0
Endocrine, chemo and targeted therapy	8	7.1
Chemo and targeted therapy	5	4.5
No	15	13.4
Metastatic disease at time of LP
Yes	74	66.1
No	38	33.9
Started Radiotherapy after LP
Yes	26	23.2
Whole brain	17	15.2
Up to and including vertebra C2	15	13.4
Localized	7	6.3
Stereotactic	2	1.8
No	86	76.8
Started systemic therapy after LP <6 months
Yes	53	47.3
No	54	48.2
Unknown	5	4.5
Median OS in years (IQR)	1.78 (0.41-11.7)

## Sheet: Supplementary Table S4
Supplementary Table S4- Samples Fast-SeqS <5 having alterations on single chromosome arms
Patient no.	Genome-wide z-score	Loss	Gain	Final CNS diagnosis	Cytology
3	0.21		8q	No CNS diagnosis	Negative
13	1.42	5q		Radiological suspicion of LM	Negative
14	2.10		1q and 8q	LM (positive cytology) and status after resection/RT	Positive
24	2.09	11q	5q	No CNS diagnosis	Negative
56	2.43		1q and 5q	No CNS diagnosis	Negative
61	3.86	4p	12q and 3p	Dural metastases	Negative
65	2.15	2q	8q	Brain and dural metastasis at LP	Negative
66	2.81	5q	10q and 7q	LM (positive cytology)	Positive
85	2.12	5q		No CNS diagnosis	Negative
116	2.46		5q	No CNS diagnosis	Negative

## Sheet: Supplementary Table S5
Supplementary Table S5 - CSF samples with mFAST-SeqS z-score ≥5 but with negative CSF cytology
	No final diagnosis of CNS metastasis						Final diagnosis of CNS metastasis
Patient no.	54	59	60	119	9	82	52	69	106	107	109	111	113	117
z-score	22.72	40.97	7.13	16.98	8.28	7.55	31.01	16.27	37.53	7.50	12.84	6.76	5.79	51.61
Clinical signs
Headache	No	Yes	No	Yes	No	Yes	Yes	No	Yes	No	No	No	No	No
Nausea/vomiting	No	Yes	Yes	Yes	No	No	Yes	No	Yes	Yes	No	No	No	Yes
Mental changes	No	No	Yes	Yes	No	No	No	No	No	No	No	Yes	No	No
Walking difficulties	No	No	Yes	No	Yes	No	Yes	No	No	No	No	Yes	Yes	Yes
Meningeal rigidity	No	No	No	No	No	No	No	No	No	No	No	No	No	No
Cranial nerve palsies	No	Yes	Yes	No	No	No	Yes	Yes	No	No	Yes	No	No	No
	-	Trigeminal nerve dysfunction; Hypoglossal palsy	Dysarthria	-	-	-	Visual disturbances	Trigeminal nerve dysfunction	-	-	Trigeminal nerve dysfunction	-	-	-
Spinal symptoms	Yes	No	Yes	Yes	Yes	Yes	No	No	Yes	Yes	Yes	Unknown	Yes	Yes
	Limb weakness; neck/back pain; sensory symptoms (limbs)		Limb weakness; bladder/bowel dysfunction; sensory symptoms (limbs)	Radiating limb pain; neck/back pain	Limb weakness; radiating limb pain; neck/back pain	Radiating limb pain; neck/back pain	-	-	Limb weakness	Limb weakness; radiating limb pain	Sensory symptoms (limbs)	-	Back pain; sensory symptoms (limbs)	Limb weakness; bladder/bowel dysfunction; sensory symptomes (limbs)
OS (days)	48	43	51	83	1756 (still alive)	5313 (still alive)	221	649	39	178	269	19	505	28
Cytology	Negative	Equivocal	Negative	Negative	Negative	Negative	Negative	Negative	Negative	Negative	Negative	Negative	Negative	Negative
CSF chemistry
Leukocytes (x 106/L, normal = 0-4 x 106/L)	0	7	0.3	23	1	1	19	1	1.7	1	0.7	0	1	1.7
Protein (g/L, normal = 0.18-0.58 g/L )	0.13	0.18	0.49	1.18	0.22	0.49	0.56	0.37	0.44	0.36	0.37	0.65	0.26	0.71
Glucose (mmol/L, normal = 2.5-3.7 mmol/L )	4.4	4.4	3.3	4.4	3.3	3.4	3.5	3.7	4.6	4.3	3.5	4.4	3.4	3.9
Imaging	MRI brain: normal	CT brain: normal	MRI brain: normal	MRI brain: ossal metastases skull with enhancement of dura (probably in continuated with bone metastases)	MRI spine: normal	MRI Spine: Linear enhancement suggestive for LM but not conclusive	CT brain: only brain metastasis	MRI brain: bone and dural metastasis	MRI brain: normal	MRI brain: right frontal dural enhancement; MRI spine: bone metastasis	MRI brain: dural enhancement alongside the left hemisphere	MRI spine: pathological leptomeningeal enhancement along the ventral and dorsal spinal cord (linear + nodular), mainly thoracally located	MRI spine: bone metastasis	MRI spine: bone metastasis
Extra-cranial metastatic sites	Lymph nodes; lung; lymphangitis carcinomatosa	Bone; lymph nodes	Bone; liver; lymph node; lung	Bone; lymph nodes; lung	No	No	No	Bone; lymh node; subcutaneous	Bone; liver; lymph node; lung	Bone; liver; lymph node	Bone	No	Bone; lymph node; lung	Bone; lymph node
Other remarks / Final CNS diagnosis	*/No CSN disease at all	SPECT: enhanced uptake skull base; received radiation of the skull base (1x8Gy)/Clinical suspicion of LM high	Clinically high suspicion of LM; but no second LP at request of patient; later MRI showed metastases of the skull base/Clinical suspicion of LM high	Radicular syndroom S1 and developed polyradiculopathy. Clinical suspicion of LM high for which whole brain radiotherapy up to and including C2/ Clinical suspicion of LM high	Five years after initial LP progressive radiating backpain; MRI spine shows enhacement of cauda equina but complicated by movement artefacts. Conclusion: no sure LM diagnosis/ Radiographic suspicion of LM	*/No CNS disease at all	MRI performed 15 days after LP showed leptomeningeal enhancement besides metastasis in the vermis/ Brain metastasis at time of LP; LM diagnosed after LP	*/Dural metastasis at time of LP; LM diagnosed after LP	*/LM diagnosed at second LP (619 days after first LP)	* Dural metastasis only	*/Dural metastasis only	*/LM at LP (radiology proven)	*/Brain metastasis diagnosed after LP	*/Brain metastasis and LM diagnosed after LP
