# Supplementary material for: Detection of Aneuploidy in Cerebrospinal Fluid from Patients with Breast Cancer Can Improve Diagnosis of Leptomeningeal Metastases
Source: Oxford University Press journal article supplement (doi:10.1158/1078-0432.ccr-20-3954), 2021-01-29
Supplement: 10780432ccr203954-sup-253342_2_supp_6854626_qn5dvs.docx [file 10780432ccr203954-sup-253342_2_supp_6854626_qn5dvs.docx]

**Supplementary Figure S2.** Correlation between input ng cfDNA in the Oncomine Breast V2 breast panel and the median molecular coverage (i.e., the median number of uniquely
